# Supplementary material for: Generation of a CRF1-Cre transgenic rat and the role of central amygdala CRF1 cells in nociception and anxiety-like behavior
Source: eLife. 2022 Apr 7;11:e67822. doi: 10.7554/eLife.67822 (PMC9033268; doi:10.7554/eLife.67822)
Supplement: Source data 1. [file elife-67822-data1.xlsx]

## Sheet: Mem Prop
CRF1-Cre mCherry rat
Male
CeA
CRF1+
Cell#	Cm	Rm	Ra	Tau	Hold (pA)	Vm (mv)
10-26-18(1)	28.18	544.6	10.4	553.7	-18.3	-48.4
10-26-18(2)	96.21	668.6	25	130	-33.6	-52
10-26-18(3)	33.82	813.2	6	201.9	-50.7	-42.3
10-26-18(4)	59.14	249.6	14.6	816.6	-61.5	-47.1
10-25-18(1)	39.21	462.4	19.5	733.7	-47	-44.6
10-25-18(2)	29.57	325.9	8.5	245	-98.9	-39.3
10-25-18(3)	28.35	204.7	8.1	222	-38.5	-51
10-25-18(4)	72.44	157.8	9.4	639.7	-72.8	-49.2
5-1-19(1)	65.01	162.3	15	935.1	-100.1	-41.7
5-1-19(3)	33.43	172.7	9.4	297.5	-96.4	-43.6
5-1-19(4)	44.13	669.5	13.2	570.7	-45.8	-44
5-2-19(3)	81.74	477.4	15.1	151	-183	-56.9
5-2-19(4)	45.8	222.2	8.6	378.9	-43.3	-50.6
5-2-19(5)	40.92	235.9	12.9	499.4	-39.7	-48.9
Female
CeA
CRF1+
Cell#	Cm	Rm	Ra	Tau	Hold (pA)	Vm (mv)
10-10-18(1)	35.79	339.4	9.2	320	-72.6	-46.8
10-11-18(2)	49.3	172.8	15.8	701	-92.8	-40
10-16-18(1)	38.58	703.1	9.2	352.2	-39.1	-46.5
10-16-18(2)	41.58	211.1	7.4	295.9	-156.9	-37.9
10-16-18(3)	36.17	366.6	5.8	206.7	-67.7	-47.3
10-16-18(4)	93.44	269.1	8.6	780.9	-71.4	-42.5
10-16-18(5)	24.67	1300	5.9	145	-42.1	-42.1
2-26-20(2)	27.03	284.5	13.4	346.4	-15.3	-48.8
2-26-20(3)	19.77	599.5	7.3	143.2	-50	-47.1
7-30-10(1)	35.68	199.6	7.8	266.6	-73.7	-51.9
7-30-10(2)	38.53	240.6	15.4	556.2	-23.5	-52.3
7-30-10(6)	31.85	348.1	8	230.5	-14	-54.6
7-30-10(7)	34.82	738.4	6.3	217	-18.3	-50.9
8-7-20(5)	25.84	489.6	6.9	174.7	-12.2	-51.2

## Sheet: sIPSCs
CeA							CeA
Male							Female
CRF1+							CRF1+
File	Frequency (Hz)	Amplitude (pA)	Rise (ms)	Decay (ms)			File	Frequency (Hz)	Amplitude (pA)	Rise (ms)	Decay (ms)
18o26001	0.462	64.924	3.599	14.79			18o16001	1.029	52.111	3.901	14.703
18o26004	0.792	80.421	2.868	12.61			18o16004	0.718	47.736	3.974	16.506
19501004	0.896	113.853	2.42	10.012			18o16007	0.721	58.258	3.102	13.096
19501007	0.467	62.672	2.895	6.556			18o16011	0.336	90.125	2.809	10.911
19502006	2.609	63.053	2.733	7.667			18o10005	1.085	99.735	2.268	16.565
19502014	0.705	46.052	2.96	9.805			18823003	1.03	59.514	3.215	14.589
19n04001_R2	1.283	62.181	2.849	7.634			18823010	1.332	44.456	3.326	9.052
19n07004_R2	1.306	55.012	3.567	12.778			20730002	4.07	67.449	3.19	14.034
19n07009_R2	4.775	34.752	4.03	8.773			20730006	0.844	59.066	3.052	6.877
19n07010	1.307	47.067	3.116	7.63			20730013	0.818	80.43	2.747	11.072
19n07011_R2	1.549	42.821	3.417	5.608			20807011	0.644	50.636	3.393	9.825
							20810007	3.271	65.275	3.439	11.687
							20810011	1.984	48.007	3.919	16.77

## Sheet: firing
CRF1 cre rats								CRF1 cre rats
Male CRF1+								Female CRF1+
CRF 200 nM								CRF 200 nM
	Firing rate (Hz)								Firing rate (Hz)
File #	baseline	after CRF	wash		% change			File #	baseline	after CRF	wash		% change
19n04002	3.52	7.19			204.261			20730010	0.1	0.18			180
19n04003_R2	0.93	2.88			309.677			20730011	0.93	1			107.527
20729004	1.57	3.27			208.28			20730018	0.74	1.34			181.081
20729005	2.8	3.87			138.214			20807000	1.53	2.18			142.484
20729013	0.35	0.98			280			20807002	0.23	0.55			239.13
20810002	0.89	1.45			162.921			20807004	0.49	0.82			167.347
20810003	1.95	2.33			119.487			20807013	0.93	1.27			136.559
20810016	4.77	5.52			115.723			20810015	1.78	3.17			178.09

## Sheet: DREADDs
Male									Male
Membrane Properties									Membrane potential (mV)				Firing
Cell#	Cm	Rm	Ra	Tau	Hold (pA)	Vm (mv)	Notes		File	Baseline	CNO 10 uM	chRMP	Baseline	CNO 10 uM
7/17/20(2)	15.51	405.5	14.6	218.8	26.9	-44	Rat #2		20717004	-69.5101	-50.75	18.7601	0	2
7/17/20(3)	25.23	517.2	11.3	278.8	-36	-46.3	Rat #2		20717009	-69.21	-64.76	4.45	0	0
7/17/20(5)	24.95	416	10.6	265.4	-17.7	-43.3	Rat #2		20717014	-65.49	-57.28	8.21	0	1
7/17/20(6)	19.76	433.4	9.4	181.3	-17.3	-40	Rat #2		20717018	-52.83	-47.85	4.98	0	3
7/23/20(2)	47.89	339.3	9.3	435.2	-44.6	-49.3	Rat #5		20723002	-66.01	-64.18	1.83	1	2
7/23/20(4)	35.63	470.5	11.4	396.4	-65.9	-40.4	Rat #5		20723008	-60.12	-54.08	6.04	3	13
7/23/20(5)	32.18	203.7	9.1	279.1	-30.5	-55.2	Rat #5		20723015	-57.4	-53.47	3.93	2	4
7/23/20(6)	28.34	234.5	15.5	462.1	-40.3	-51.2	Rat #5		20723021	-58.65	-53.83	4.82	0	0
7/23/20(7)	52	137.6	14.9	323.8	-289.3	-20	Rat #5		20723028	-51.54	-46.78	4.76	1	5
7/23/20(8)	39.82	146.2	8.3	313.4	-79.3	-45	Rat #5		20723031	-57.8	-52.25	5.55	0	1
Female									Female
Membrane Properties									Membrane potential (mV)				Firing
Cell#	Cm	Rm	Ra	Tau	Hold (pA)	Vm (mv)	Notes		File	Baseline	CNO 10 uM	chRMP	Baseline	CNO 10 uM
7/20/20(1)	35.45	371.6	9.4	326.5	-61.6	-40.1	Rat #3		20720008	-65.25	-64.06	1.19	3	6
7/20/20(2)	26.14	330	8	208.4	-42.7	-44.3	Rat #3		20720012	-57.13	-50.66	6.47	3	8
7/20/20(3)	29.38	472.2	9.6	277.5	-62.9	-46	Rat #3		20720016	-59.88	-49.87	10.01	0	4
7/20/20(4)	48.31	394.9	4.7	225.3	-39.7	-50.3	Rat #3		20720023	-54.23	-53.04	1.19	4	10
7/20/20(5)	11.99	769.5	10.6	126	-19.5	-40.3	Rat #3		20722001	N/A	N/A	N/A	0	1
7/20/20(6)	35.42	263.6	9.4	322.7	-72.6	-38.9	Rat #3		20722004	N/A	N/A	N/A	0	0
7/22/20(1)	25.73	389.8	9.9	247.4	-43.9	-44.7	Rat #4		20722007	-57.83	-54.87	2.96	3	6
7/22/20(2)	21.16	321.7	12.6	256.5	-43.3	-43.5	Rat #4		20722014	-47.42	-32.56	14.86	0	1
7/22/20(3)	36.89	220	7.5	268.4	-58	-45.3	Rat #4		20722020	-56.85	-55.02	1.83	0	1
7/22/20(4)	31.32	285.3	12.6	378.2	-60.4	-38.2	Rat #4		20722023	-49.59	-44.68	4.91	0	0
7/22/20(5)	29.51	259.2	15.2	350.8	-37.8	-45.7	Rat #4
7/22/20(6)	31.63	271.2	11.3	342.8	-56.2	-36	Rat #4
