# Supplementary material for: Generation of a CRF1-Cre transgenic rat and the role of central amygdala CRF1 cells in nociception and anxiety-like behavior
Source: eLife. 2022 Apr 7;11:e67822. doi: 10.7554/eLife.67822 (PMC9033268; doi:10.7554/eLife.67822)
Supplement: Source data 2. [file elife-67822-data2.xlsx]

## Sheet: Sheet1
Effects of DREADD Stimulation of CeA CRFR1:Cre Cells on Nocifensive & Anxiety Responses (Figure 7)
					Von Frey			Hargreaves			EPM		Open Field		Light-Dark Box
Rat ID	Sex	Virus	Treatment		Baseline	Test		Baseline	Test		% Open Arms Time		% Center Time		% Time in Light
1	M	Active	Veh		38.1	37		6.52	8.18		N/A		6.6		23.67
2	M	Active	CNO		43.58	11.75		8.89	5.88		10.15		4.23		2
3	M	Control	Veh		38.73	40.63		11.71	10.14		31.94		9.07		21.33
5	F	Control	Veh		35.83	39.9		8.23	8.41		36.1		7.03		39
6	M	Control	CNO		55.33	47.15		12.54	8.16		23.61		11.8		22
7	M	Control	CNO		28.2	33.55		8.49	8.48		37.67		7.37		23.33
8	F	Active	CNO		34.53	14.23		7.14	6.22		34.23		5.47		36.33
9	F	Active	Veh		51.78	37.03		10.28	8.07		33.24		8.3		41.33
10	F	Active	Veh		34.73	36.83		9.72	8.05		31.22		11.1		50.67
11	F	Active	CNO		46.2	17.73		13	7.42		37.93		9.2		56
12	F	Active	Veh		50.15	42		7.09	7.21		33.1		7.73		59.67
13	F	Active	Veh		39.83	42.55		7.31	6.34		35.33		7.57		16
15	M	Active	Veh		58.83	50.98		5.97	5.7		39.1		4.7		5.33
16	M	Control	CNO		39.25	33.85		5.92	7.16		25.47		11		33
17	M	Control	Veh		39.08	42.93		7.84	6.26		31.1		5.77		69
18	M	Control	Veh		38.13	28.2		5.57	9.11		20.33		4.6		39
19	M	Active	CNO		35.38	22.85		7.78	11.55		4.9		1.37		33.33
20	M	Active	CNO		46.68	30.05		7.54	9.49		16		2		35.67
21	F	Active	CNO		41.85	22.38		7.19	8.31		18.33		2.4		49.67
22	F	Active	CNO		26.23	22.13		7.36	7.61		31.63		2.8		44
23	F	Control	CNO		38.63	42.83		9	9.4		37.3		8		43
24	F	Control	Veh		32.9	31.6		6.22	6.85		37.6		3.3		50.33
25	F	Control	CNO		47.63	47		7.63	6.78		53.9		6.37		45
26	F	Control	CNO		42.25	43.95		4.66	5.63		35.77		6.47		38.33
27	M	Active	Veh		49.45	49.13		8.35	6.7		34.87		7.4		47.67
28	M	Active	CNO		31.5	13.55		6.46	6.57		17.17		1.73		37.33
